# Supplementary material for: Can novel early non-invasive biomarkers of embryo quality be identified with time-lapse imaging to predict live birth?
Source: PubMed Central journal article supplement — Hum Reprod. 2019 Jul 9;34(8):1439–49. doi: 10.1093/humrep/dez085 (PMC6688874; doi:10.1093/humrep/dez085), 2019-07-09
Supplement: supplementary_table_s1_dez085.pdf [file supplementary_table_s1_dez085.pdf]

**Supplementary Table S1** Definitions of morphokinetic variables.

|                      |                                                                                                       |
|----------------------|-------------------------------------------------------------------------------------------------------|
| t0                   | Time of micro-injection                                                                               |
| tPB2                 | Time for second PB emission                                                                           |
| tPNa                 | Time for PN appearance (hours)                                                                        |
| tPNjuxta             | Time for PN juxtaposition (hours)                                                                     |
| tPNf                 | Time for PN fading (hours)                                                                            |
| t2                   | Time from insemination to divisions to two cells complete (hours)                                     |
| t3                   | Time from insemination to divisions to three cells complete (hours)                                   |
| t4                   | Time from insemination to divisions to four cells complete (hours)                                    |
| VP                   | The time period in which the pronuclei are visible (tPNf-tPNa)                                        |
| ECC1                 | The time period of the first cell cycle (t2-tPB2)                                                     |
| ECC2                 | The time period of the second cell cycle (t4-t2)                                                      |
| S2                   | The time period to complete synchronous divisions (t4-t3)                                             |
| DC                   | Direct cleavage from one to three cells direct cleavage (at the first cleavage, in less than 5 hours) |
| RC                   | Reabsorption of one blastomere during division                                                        |
| MNB <sup>2cell</sup> | Multinuclearity at the 2-cell stage                                                                   |
| MNB <sup>4cell</sup> | Multinuclearity at the 4-cell stage                                                                   |

Unless stated otherwise all times are measured from t0.
