# Supplementary material for: Can novel early non-invasive biomarkers of embryo quality be identified with time-lapse imaging to predict live birth?
Source: PubMed Central journal article supplement — Hum Reprod. 2019 Jul 9;34(8):1439–49. doi: 10.1093/humrep/dez085 (PMC6688874; doi:10.1093/humrep/dez085), 2019-07-09
Supplement: supplementary_table_s2_dez085.pdf [file supplementary_table_s2_dez085.pdf]

**Supplementary Table SII Patient/cycle characteristics of included single-embryo transfers.**

|                                                  | Live birth   |              | P-value |
|--------------------------------------------------|--------------|--------------|---------|
|                                                  | No (n = 133) | Yes (n = 99) |         |
| Maternal age (y)                                 | 31.0 ± 4.5   | 30.6 ± 3.8   | 0.496   |
| Paternal age (y)                                 | 34.0 ± 5.9   | 33.1 ± 5.4   | 0.233   |
| Maternal BMI (kg/m <sup>2</sup> )                | 24.0 ± 4.3   | 23.7 ± 4.2   | 0.608   |
| Ovarian reserve                                  |              |              |         |
| Basal FSH (UI/L)                                 | 7.1 ± 2.3    | 7.4 ± 2.0    | 0.386   |
| AMH (ng/ml)                                      | 4.4 ± 4.1    | 4.3 ± 4.6    | 0.897   |
| Maternal smoking                                 |              |              |         |
| Yes                                              | 12 (9.0)     | 9 (9.2)      | 0.423   |
| No. never                                        | 89 (66.9)    | 58 (59.2)    |         |
| Yes. former                                      | 32 (24.1)    | 31 (31.6)    |         |
| Cause of infertility                             |              |              |         |
| Male                                             | 45 (33.8)    | 44 (44.5)    | 0.081   |
| Female                                           | 24 (18.1)    | 20 (20.2)    |         |
| Mixed                                            | 62 (46.6)    | 31 (31.3)    |         |
| Idiopathic                                       | 2 (1.5)      | 4 (4.0)      |         |
| Controlled ovarian stimulation protocol          |              |              |         |
| Long agonist                                     | 83 (62.4)    | 82 (82.8)    | 0.003   |
| Short agonist                                    | 10 (7.5)     | 3 (3.0)      |         |
| Antagonist                                       | 40 (30.1)    | 14 (14.2)    |         |
| Rank of attempt                                  |              |              |         |
| 1                                                | 122 (91.7)   | 92 (92.9)    | 0.681   |
| 2                                                | 10 (7.5)     | 7 (7.1)      |         |
| 3                                                | 1 (1.0)      | 0 (0)        |         |
| Retrieved oocytes per cycle                      | 12.5 ± 5.1   | 12.3 ± 4.3   | 0.734   |
| Injected oocytes per cycle                       | 9.3 ± 3.8    | 9.5 ± 3.2    | 0.581   |
| Embryos per cycle                                | 7.3 ± 3.5    | 7.5 ± 3.1    | 0.685   |
| No. of transferred embryos                       |              |              |         |
| at Day 2                                         | 111 (83.5)   | 86 (86.9)    | 0.473   |
| at Day 3                                         | 22 (16.5)    | 13 (13.1)    |         |
| Transferred plus cryopreserved embryos per cycle | 3.7 ± 2.0    | 4.0 ± 1.8    | 0.250   |

For categorical variables, n (%) are presented. For continuous variables, mean (± SD) are presented.
