# Supplementary material for: Can novel early non-invasive biomarkers of embryo quality be identified with time-lapse imaging to predict live birth?
Source: PubMed Central journal article supplement — Hum Reprod. 2019 Jul 9;34(8):1439–49. doi: 10.1093/humrep/dez085 (PMC6688874; doi:10.1093/humrep/dez085), 2019-07-09
Supplement: supplementary_table_s3_dez085.pdf [file supplementary_table_s3_dez085.pdf]

**Supplementary Table SIII Associations\* between fertilisation/embryonic timings and morphological embryonic features (PN position at time of juxtaposition and the timing of the first cleavage).**

|                                     | n   | Zygote/embryo event | Time (h) to event |                   | P-value |
|-------------------------------------|-----|---------------------|-------------------|-------------------|---------|
|                                     |     |                     | Mean $\pm$ SD     | Median (IQR)      |         |
| <b>Position of PN juxtaposition</b> |     |                     |                   |                   |         |
| Central                             | 101 | tPNjuxta            | 12.3 $\pm$ 2.9    | 12.4 (10.5–14.4)  | <0.001  |
| Other                               | 131 |                     | 10.6 $\pm$ 2.5    | 9.9 (8.9–11.9)    |         |
| <b>First cleavage</b>               |     |                     |                   |                   |         |
| <26 h                               | 181 | tPB2                | 2.8 $\pm$ 0.9     | 2.6 (2.2–3.2)     | 0.004   |
| $\geq$ 26 h                         | 51  |                     | 3.1 $\pm$ 0.9     | 3.0 (2.6–3.5)     |         |
| <26 h                               | 181 | tPNf                | 21.3 $\pm$ 1.4    | 21.4 (20.32–22.4) | <0.001  |
| $\geq$ 26 h                         | 50  |                     | 24.8 $\pm$ 1.1    | 24.4 (24.1–25.4)  |         |
| <26 h                               | 181 | t2                  | 23.7 $\pm$ 1.4    | 23.8 (22.7–24.9)  | <0.001  |
| $\geq$ 26 h                         | 51  |                     | 27.4 $\pm$ 1.0    | 27.0 (26.5–28.0)  |         |
| <26 h                               | 181 | t3                  | 35.4 $\pm$ 2.6    | 35.5 (34.1–36.8)  | <0.001  |
| $\geq$ 26 h                         | 51  |                     | 39.0 $\pm$ 2.2    | 38.8 (38.2–43.8)  |         |
| <26 h                               | 181 | t4                  | 36.3 $\pm$ 2.7    | 36.4 (34.7–37.8)  | <0.001  |
| $\geq$ 26 h                         | 51  |                     | 40.0 $\pm$ 1.9    | 39.88 (38.8–41.2) |         |
| <26 h                               | 181 | VP                  | 13.9 $\pm$ 2.1    | 14.1 (12.7–15.7)  | <0.001  |
| $\geq$ 26 h                         | 50  |                     | 16.9 $\pm$ 1.9    | 17.0 (15.8–18.4)  |         |

\*Only significant associations are presented ( $P < 0.01$ , Mann–Whitney test).

tPNjuxta, time for PN juxtaposition (hours); tPB2, time for PB2 emission; tPNf, time for PN fading; t2, time from insemination to divisions to two cells complete; t3, time from insemination to divisions to three cells complete; t4, time from insemination to divisions to four cells complete; VP, the time period in which the pronuclei are visible (tPNf–tPNa).
