# Supplementary material for: Can novel early non-invasive biomarkers of embryo quality be identified with time-lapse imaging to predict live birth?
Source: PubMed Central journal article supplement — Hum Reprod. 2019 Jul 9;34(8):1439–49. doi: 10.1093/humrep/dez085 (PMC6688874; doi:10.1093/humrep/dez085), 2019-07-09
Supplement: supplementary_table_s4_dez085.pdf [file supplementary_table_s4_dez085.pdf]

**Supplementary Table SIV Timing from ICSI (mean  $\pm$  SD) depending on live birth outcomes.**

|          | Live birth                 |                            | P-value |
|----------|----------------------------|----------------------------|---------|
|          | No (n = 133)               | Yes (n = 99)               |         |
| tPB2     | 2.8 $\pm$ 1.0 (1.2–7.2)    | 2.9 $\pm$ 0.9 (1.5–7.6)    | 0.387   |
| tPNa     | 7.5 $\pm$ 1.9 (4.4–17.1)   | 7.6 $\pm$ 1.6 (4.6–12.5)   | 0.588   |
| tPNjuxta | 11.2 $\pm$ 2.8 (5.4–24.1)  | 11.6 $\pm$ 2.8 (6.8–17.7)  | 0.291   |
| tPNf     | 22.2 $\pm$ 1.9 (16.9–27.4) | 21.9 $\pm$ 2.0 (17.7–27.7) | 0.242   |
| t2       | 24.6 $\pm$ 2.0 (20.5–29.4) | 24.4 $\pm$ 2.0 (20.4–29.7) | 0.246   |
| t3       | 36.3 $\pm$ 3.0 (24.0–43.8) | 36.0 $\pm$ 2.8 (29.4–44.1) | 0.573   |
| t4       | 37.3 $\pm$ 3.1 (24.0–45.4) | 36.9 $\pm$ 2.8 (31.4–44.1) | 0.404   |
| VP       | 14.8 $\pm$ 2.5 (7.0–19.7)  | 14.3 $\pm$ 2.2 (9.0–19.3)  | 0.112   |
| ECC1     | 21.8 $\pm$ 2.1 (16.4–28.1) | 21.4 $\pm$ 1.9 (16.4–27.0) | 0.156   |
| ECC2     | 12.6 $\pm$ 2.2 (0–21.4)    | 12.6 $\pm$ 2.3 (8.0–21.4)  | 0.934   |
| S2       | 1.0 $\pm$ 1.4 (0–9.0)      | 0.9 $\pm$ 1.5 (0–11.7)     | 0.478   |

Student t-test was used.

tPB2, time for second polar body emission; tPNa, time for pro nuclei (PN) appearance; tPNjuxta, time for PN juxtaposition; tPNf, time for PN fading; t2, time from insemination to divisions to two cells complete; t3, time from insemination to divisions to three cells complete; t4, time from insemination to divisions to four cells complete; VP, the time period in which the pronuclei are visible (tPNf–tPNa); ECC1, the time period of the first cell cycle (t2–tPB2); ECC2, the time period of the second cell cycle (t4–t2); S2, the time period to complete synchronous divisions (t4–t3).
