# Supplementary figures and images for: Can novel early non-invasive biomarkers of embryo quality be identified with time-lapse imaging to predict live birth?
Source: PubMed Central journal article supplement — Hum Reprod. 2019 Jul 9;34(8):1439–49. doi: 10.1093/humrep/dez085 (PMC6688874; doi:10.1093/humrep/dez085), 2019-07-09

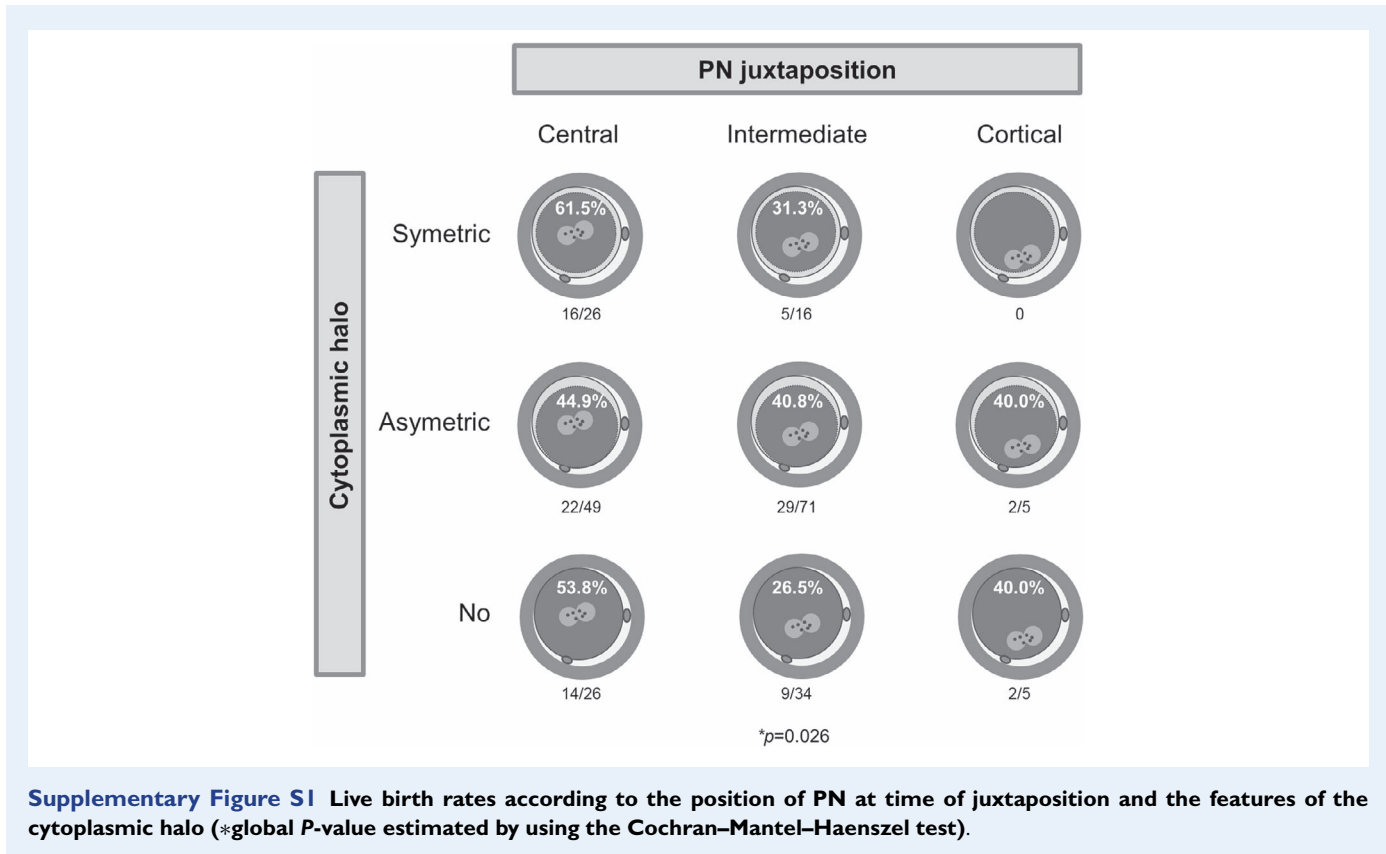

Supplement: supplementary_figure_s1_dez085.pdf [file supplementary_figure_s1_dez085.pdf]
